# Supplementary figures and images for: Identification of DNA–protein complexes using an improved, combined western blotting-electrophoretic mobility shift assay (WEMSA) with a fluorescence imaging system
Source: Royal Society of Chemistry journal article supplement (doi:10.1039/c2mb05500g), 2012-02-03

Supplement 1

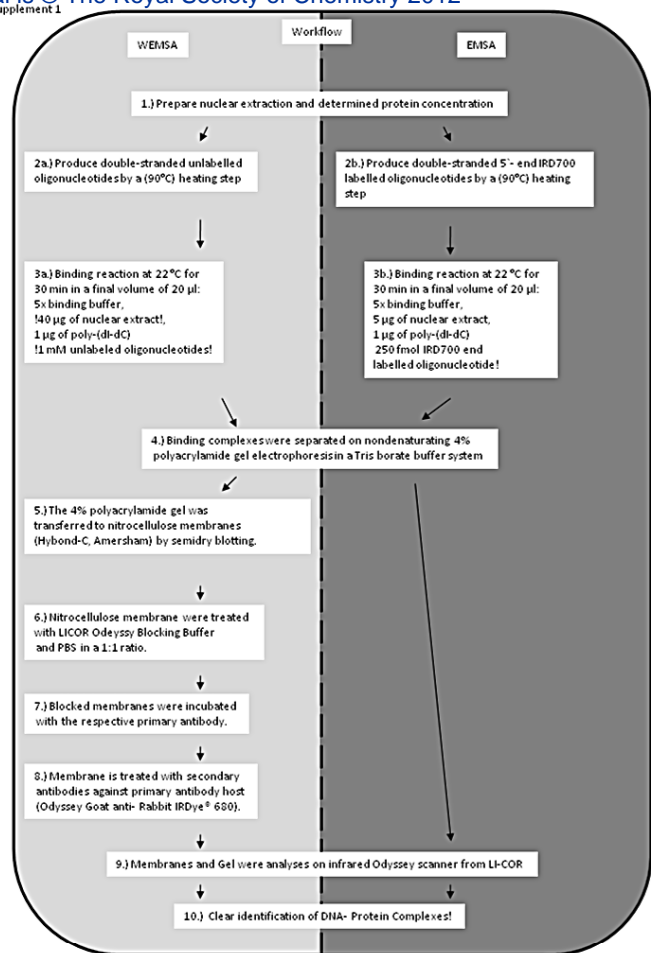

Supplement: c2mb05500g.pdf [file c2mb05500g.pdf]
